# Supplementary material
Source: MDPI journal article supplement (https://www.mdpi.com/2073-4344/13/3/635)
Supplement: s1 [file s1]

# Giving a new life to waste cigarette butts: transformation into platinum group metal-free electrocatalysts for oxygen reduction reaction in acid, neutral and alkaline environment

Davide Testa<sup>1,†</sup>, Giovanni Zuccante<sup>1,†</sup>, Mohsin Muhyuddin<sup>1,†</sup>, Roberto Landone<sup>1</sup>, Axel Scommegna<sup>1</sup>, Roberto Lorenzi<sup>1</sup>, Maurizio Acciarri<sup>1</sup>, Elisabetta Petri<sup>2</sup>, Francesca Soavi<sup>2</sup>, Lorenzo Poggini<sup>3</sup>, Laura Capozzoli<sup>3</sup>, Alessandro Lavacchi<sup>3</sup>, Niccolò Lamanna<sup>4</sup>, Andrea Franzetti<sup>4</sup>, Luca Zoia<sup>4</sup>, Carlo Santoro<sup>1,\*</sup>

<sup>1</sup> Department of Materials Science, University of Milano-Bicocca, U5 Via Cozzi 55, 20125, Milan, Italy; d.testa@campus.unimib.it; g.zuccante@campus.unimib.it; m.muhyuddin@campus.unimib.it; r.landone@campus.unimib.it; a.scommegna1@campus.unimib.it; roberto.lorenzi@unimib.it; maurizio.acciarri@unimib.it

<sup>2</sup> Department of Chemistry "G. Ciamician", Alma Mater Studiorum University of Bologna, Via Selmi 2, 40100 Bologna, Italy

<sup>3</sup> Istituto di Chimica Dei Composti OrganoMetallici (ICCOM), Consiglio Nazionale Delle Ricerche (CNR), Via Madonna Del Piano 10, 50019 Sesto Fiorentino, Firenze, Italy

<sup>4</sup> Department of Earth and Environmental Sciences, University of Milano-Bicocca, Building U01, Piazza della Scienza 1, 20126 Milan, Italy

+ The authors have equally contributed to the manuscript

\* **Correspondence:** carlo.santoro@unimib.it

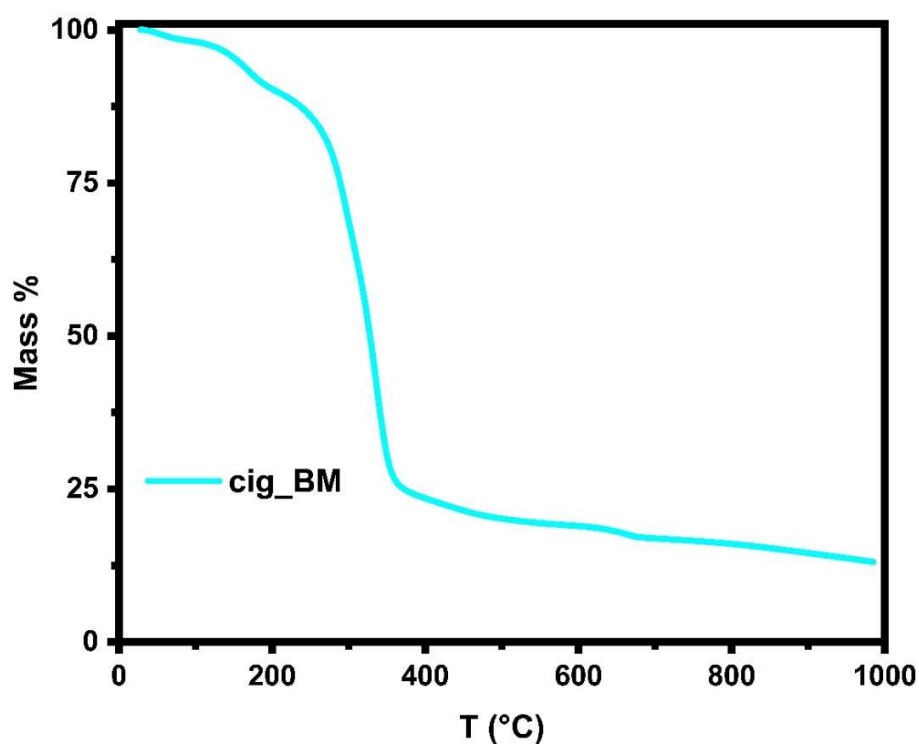

Figure S1. TGA of cig\_BM performed under N<sub>2</sub> atmosphere.

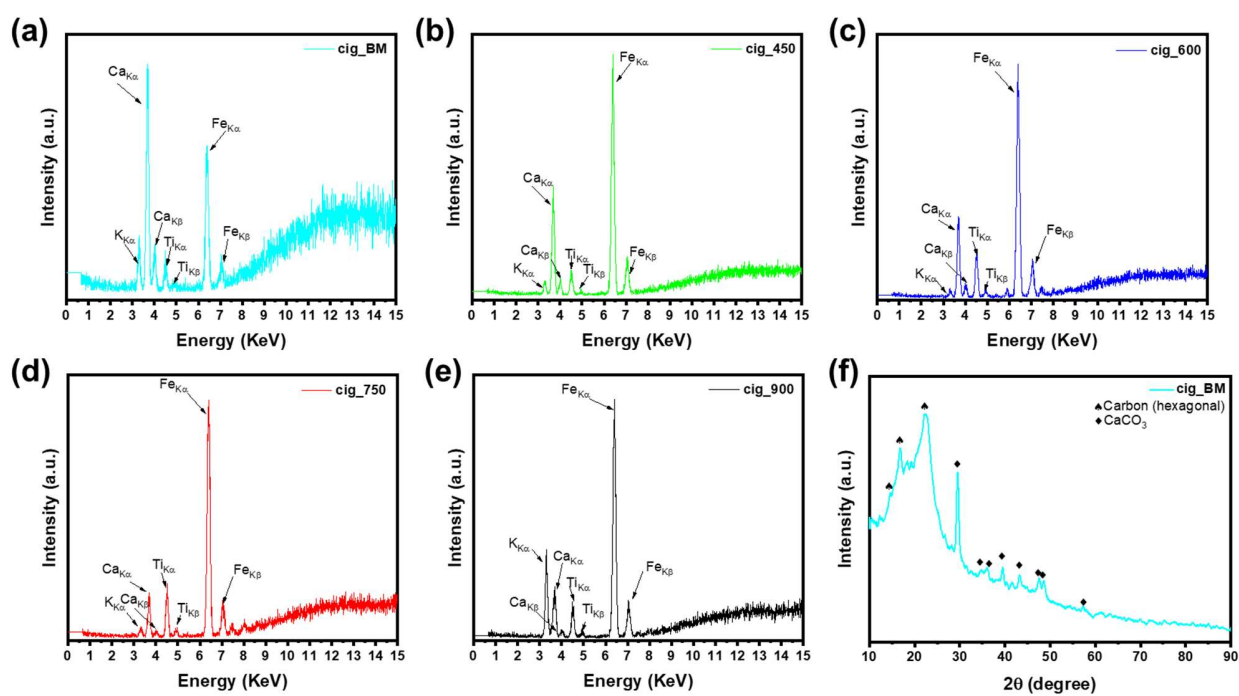

Figure S2. XRF spectra of as-synthesized samples (a-e) and XRD pattern of cig\_BM (f).

**Table S1.** Fitting result of Raman bands as a sum of bands with Breit-Wigner-Fano line shape.

| Sample  | D band         |          |         | G band         |          |        | D' band        |          |       |
|---------|----------------|----------|---------|----------------|----------|--------|----------------|----------|-------|
|         | Peak intensity | Position | FWHM    | Peak intensity | Position | FWHM   | Peak intensity | Position | FWHM  |
| cig_900 | 0.579          | 1338.990 | 82.507  | 0.421          | 1590.980 | 39.149 |                |          |       |
| cig_750 | 0.550          | 1334.580 | 85.334  | 0.450          | 1590.520 | 38.310 |                |          |       |
| cig_600 | 0.586          | 1344.680 | 124.736 | 0.414          | 1587.480 | 51.783 |                |          |       |
| cig_450 | 0.521          | 1333.720 | 45.996  | 0.345          | 1582.760 | 37.812 | 0.135          | 1616.680 | 6.645 |

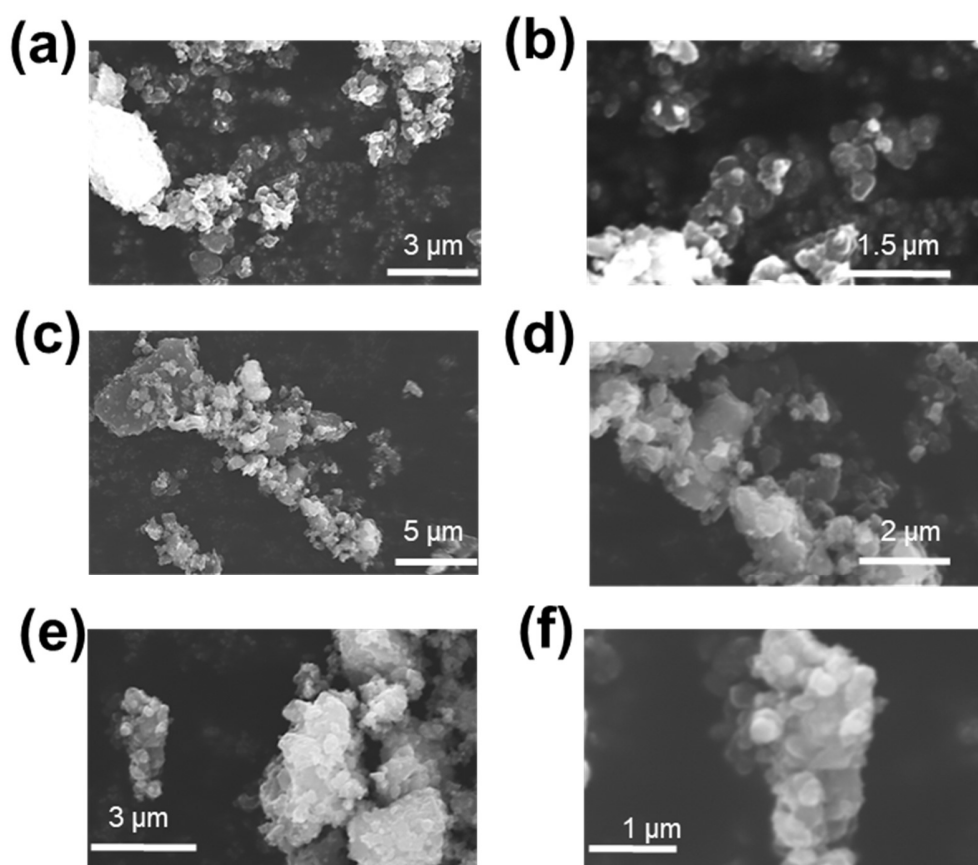

**Figure S3.** SEM micrographs of spectra of cig\_450 (a, b), cig\_600 (c,d) and cig\_900 (e,f).

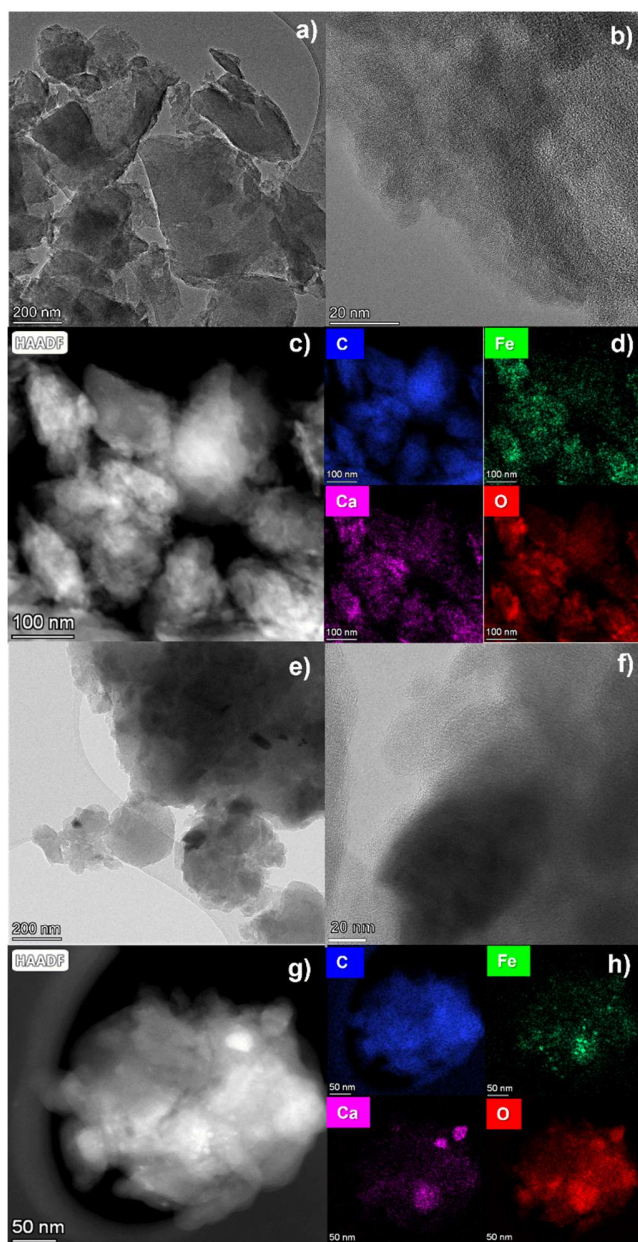

**Figure S4.** Electron microscopy investigation of cig\_600 (a-d) and cig\_900 (e-h). Low magnification HRTEM (a,e); high magnification HRTEM image (b,f); HAADF images (c,g); EDX maps of C, Fe, Ca and O (d,h).

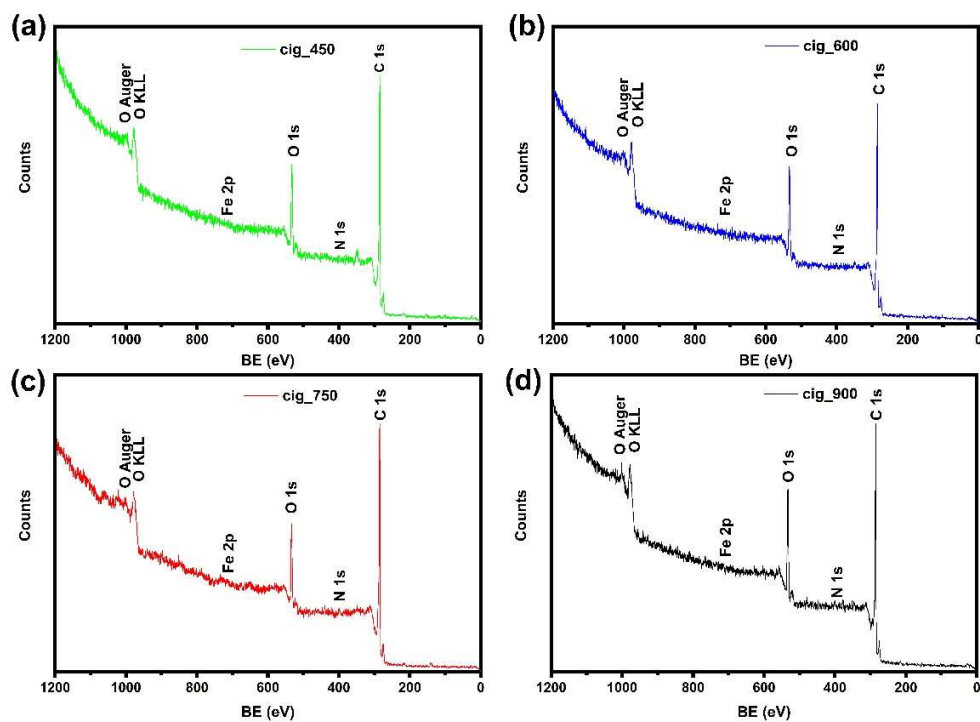

**Figure S5.** XPS survey spectra of (a) cig\_450, (b) cig\_600, (c) cig\_750 and (d) cig\_900.

**Table S2.** Percentage composition of the samples obtained by XPS analysis.

| Sample  | N1s | Fe2p |
|---------|-----|------|
| cig_450 | 1.6 | 0.3  |
| cig_600 | 1.3 | 0.2  |
| cig_750 | 2.0 | 0.2  |
| cig_900 | 1.5 | 0.3  |

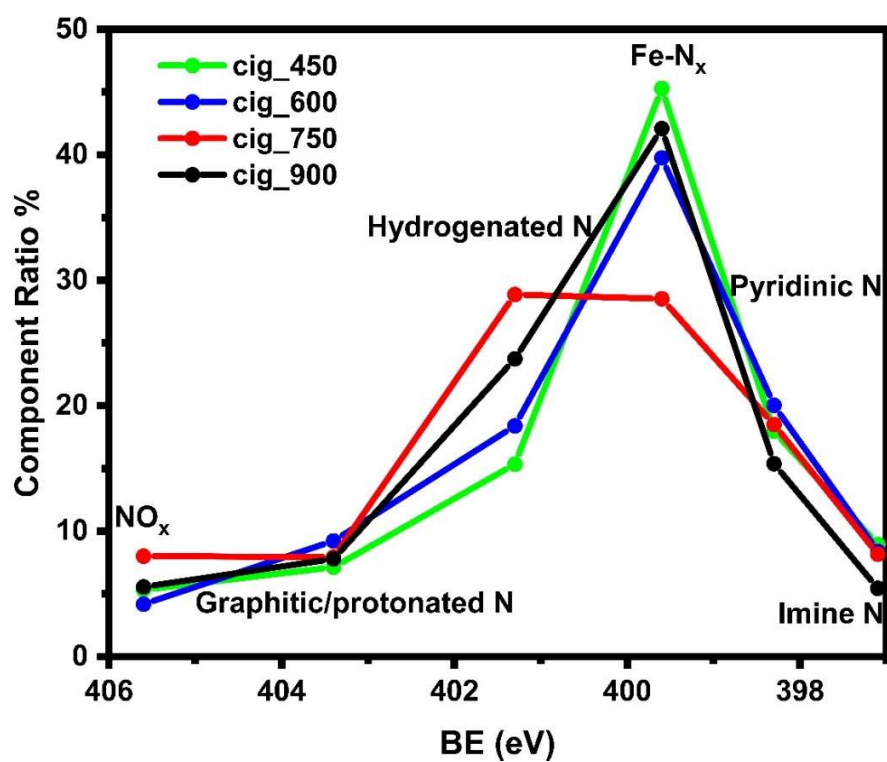

Figure S6. The component ratio of the nitrogen moieties detected by high-resolution N 1s spectra.

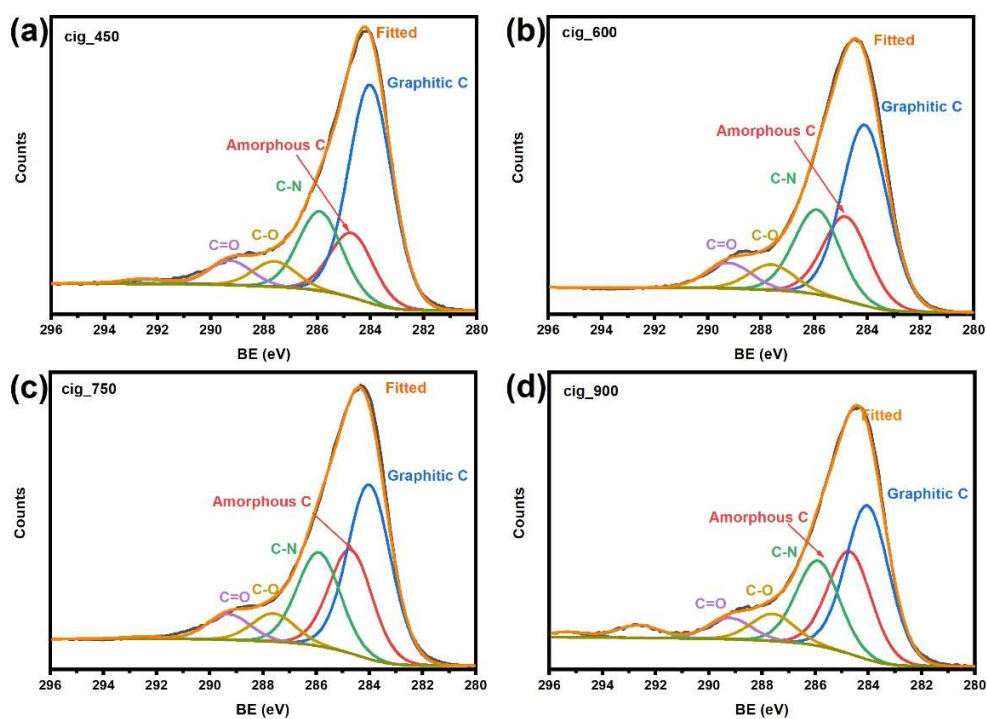

**Figure S7.** C 1s high resolution spectra of (a) cig\_450, (b) cig\_600, (c) cig\_750 and (d) cig\_900 with raw data.

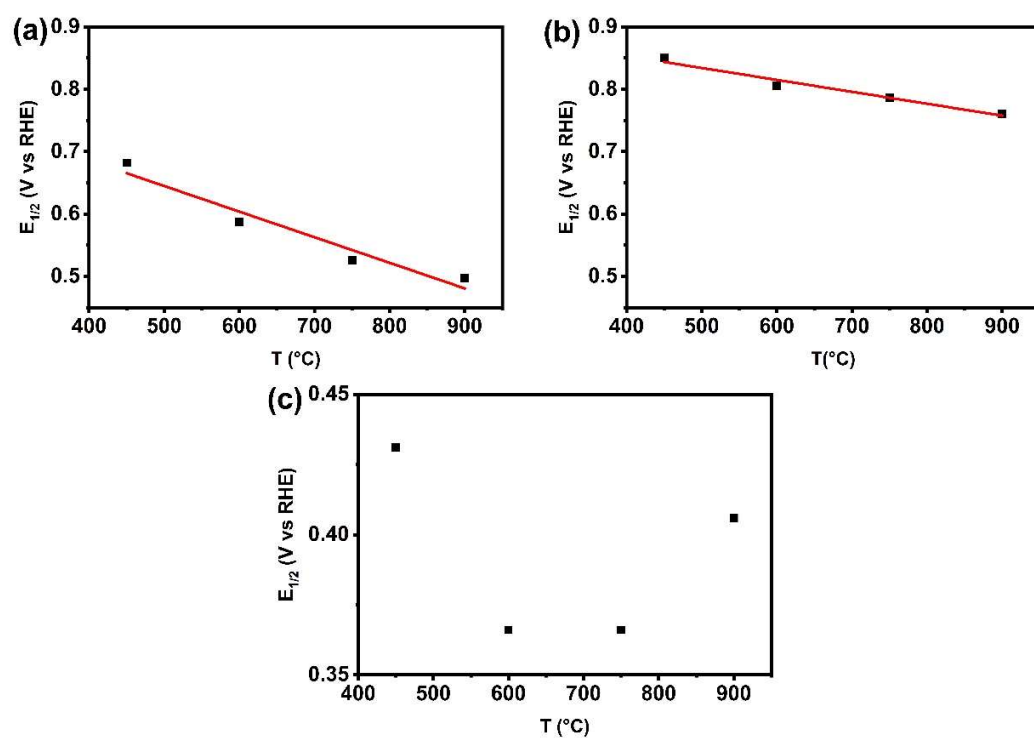

**Figure S8.**  $E_{1/2}$  vs  $T$  plots obtained in (a) acidic, (b) alkaline and (c) neutral environments. The red line observed in graphs (a) and (b) refers to the linear fit of data.



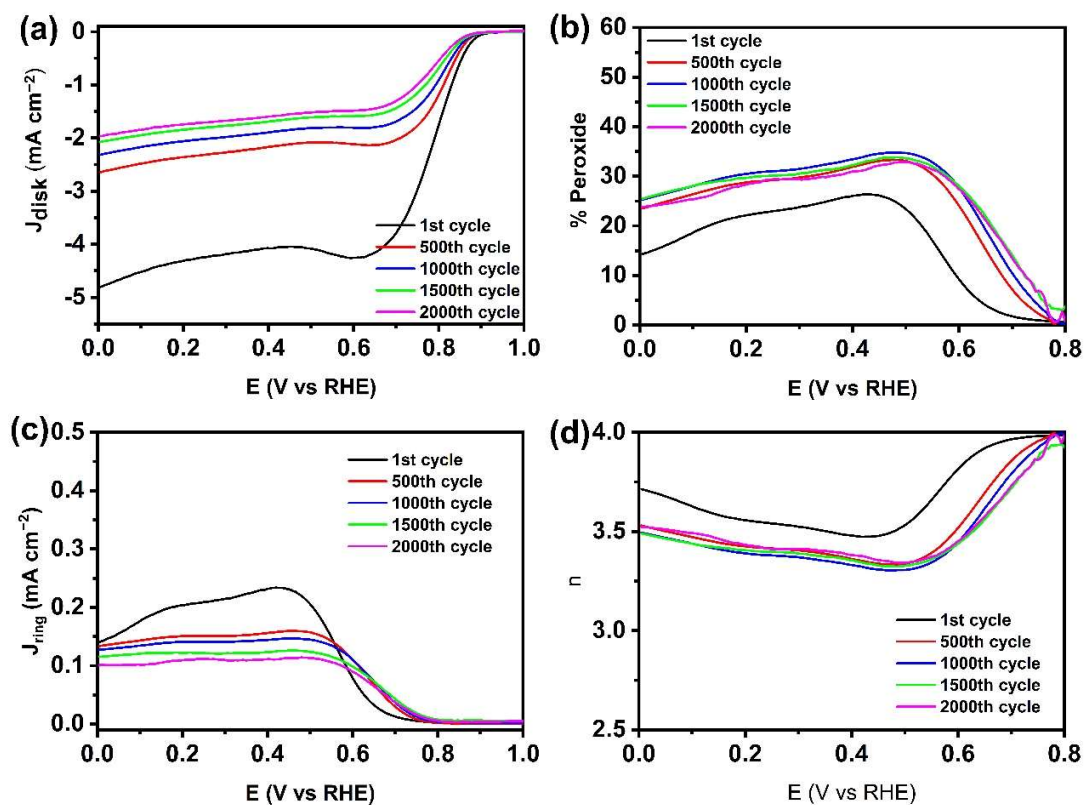

**Figure S9.** Accelerated stability tests of cig\_450 conducted in 0.1 M PBS: (a) Disk current density ( $J_{\text{disk}}$ ) and (c) Ring current density ( $J_{\text{ring}}$ ) recorded at 1600 rpm and 5 mV s<sup>-1</sup>, (b) % Peroxide yield and (d) the number of transferred electrons ( $n$ ).

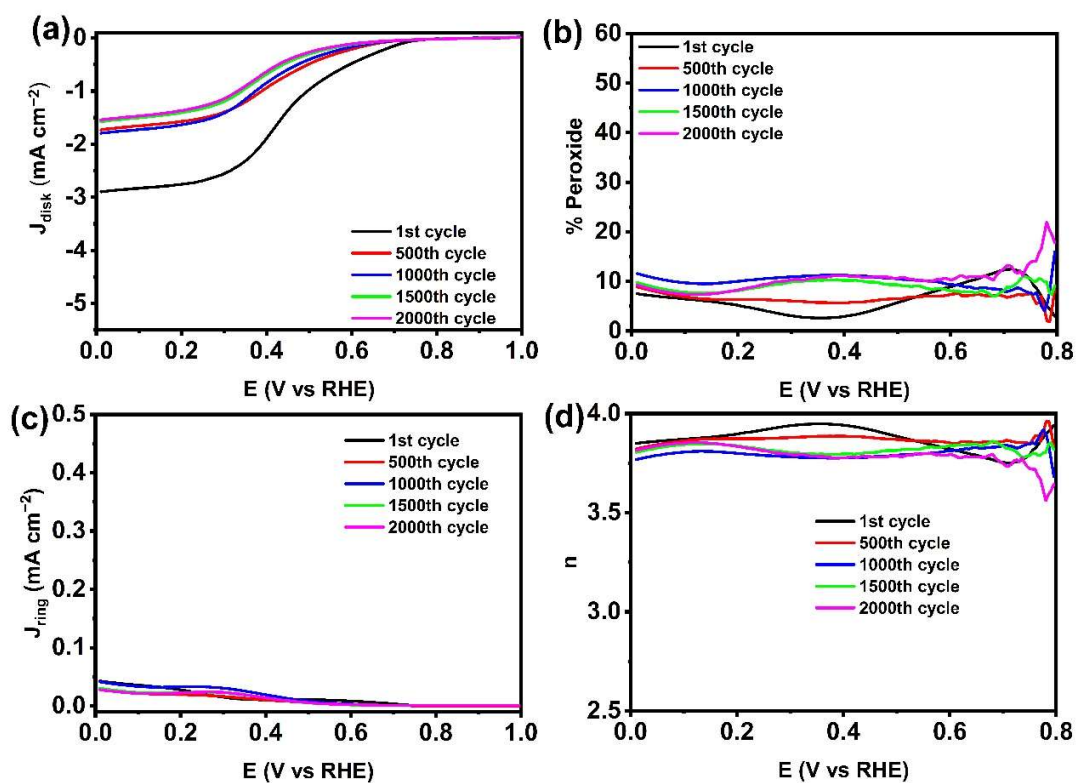

**Figure S10.** Accelerated stability tests of *cig\_450* conducted in 0.1 KOH: (a) Disk current density ( $J_{\text{disk}}$ ) and (c) Ring current density ( $J_{\text{ring}}$ ) recorded at 1600 rpm and 5 mV s<sup>-1</sup>, (b) % Peroxide yield and (d) the number of transferred electrons ( $n$ ).
